# Supplementary material
Source: PubMed Central journal article supplement (PMC8018604)

## Supporting Information

# Synthesis of an Alkynyl Methylglyoxal Probe to Investigate Non-enzymatic Histone Glycation

Qingfei Zheng<sup>1,6</sup>, Igor Maksimovic<sup>1,2,6</sup>, Akhil Upad<sup>1</sup>, David Guber<sup>1,4</sup>, Yael David<sup>1,2,3,5,\*</sup>

<sup>1</sup>Chemical Biology Program, Memorial Sloan Kettering Cancer Center, New York, NY, 10065, United States

<sup>2</sup>Tri-Institutional PhD Program in Chemical Biology, New York, NY, 10065, United States

<sup>3</sup>Department of Pharmacology, Weill Cornell Medicine, New York, NY, 10065, United States

<sup>4</sup>Department of Chemistry, City University of New York, Hunter College, New York, NY, 10065, United States

<sup>5</sup>Department of Physiology, Biophysics and Systems Biology, Weill Cornell Medicine, New York, NY, 10065, United States

<sup>6</sup>These authors contributed equally

\*Corresponding author: e-mail address: davidshy@mskcc.org

## **Supporting Information Table of Contents**

|                                                                                                      |     |
|------------------------------------------------------------------------------------------------------|-----|
| <b>Figure S1.</b> Competition treatment of AlkMGO probe and MGO to 293T cells.....                   | S3  |
| <b>Figure S2.</b> Impacts of AlkMGO-glycation on other histone post-translational modifications..... | S4  |
| <b>Figure S3.</b> LC-ESI-MS analysis of recombinant histones.....                                    | S5  |
| <b>Figure S4.</b> Full gels and uncropped immunoblots.....                                           | S7  |
| <b>Figure S5.</b> HRMS analyses of <b>2a</b> and <b>2b</b> .....                                     | S8  |
| <b>Figure S6.</b> NMR analyses of the compounds synthesized in this study.....                       | S10 |

**Figure S1.** Competition treatment of AlkMGO (**2b**) and MGO to 293T cells. The cells were co-treated with 0.25 mM AlkMGO and gradient MGO, and the histones were extracted and analyzed by in-gel fluorescence imaging and CCB-staining.

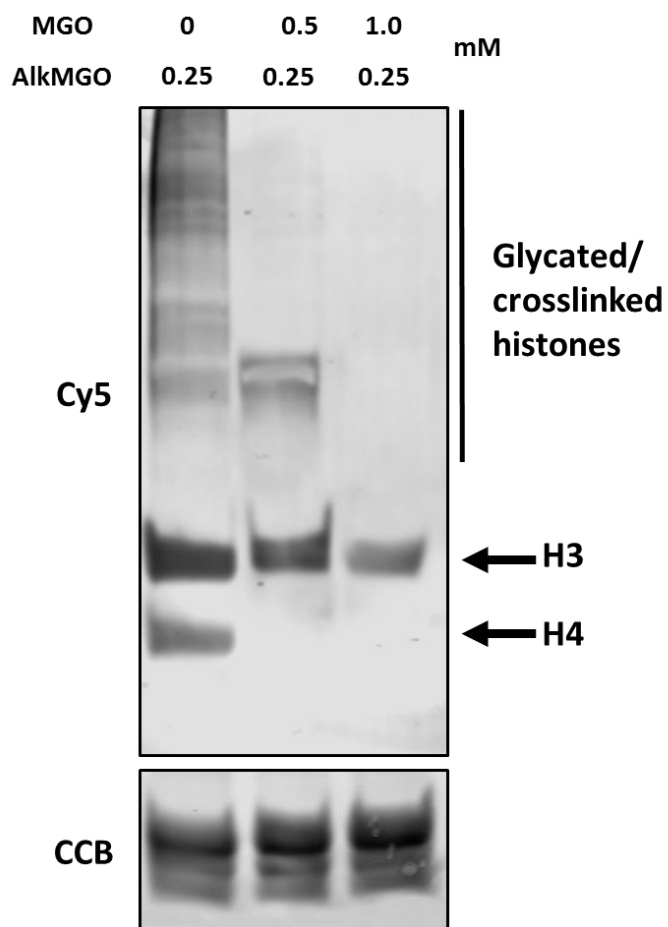

**Figure S2.** Impacts of AlkMGO-glycation on other essential histone post-translational modifications. The same samples were used as in Figure 2A, and the histones were extracted and analyzed by western blot with the indicated antibodies illustrating that essential histone post-translational modifications can be influenced by AlkMGO-glycation.

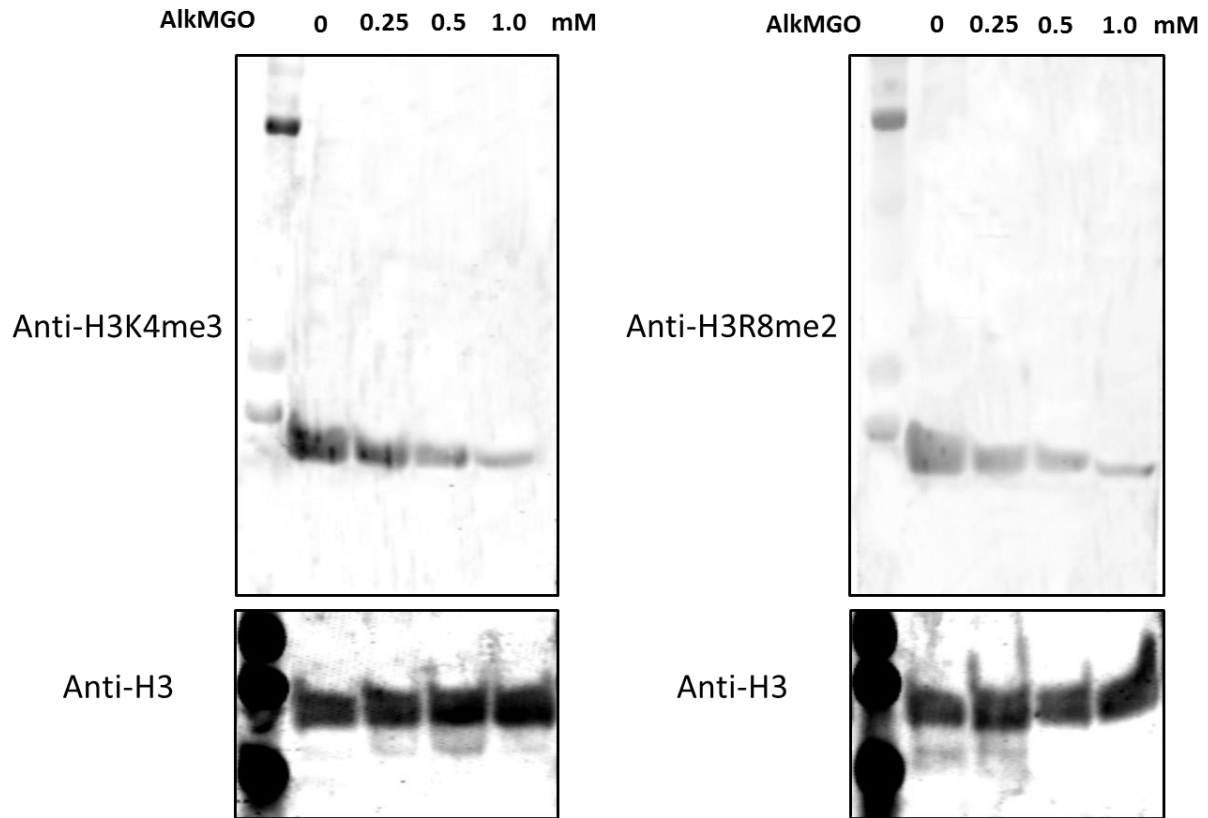

**Figure S3.** LC-ESI-MS analysis of recombinant histones. MS after deconvolution of (A) H2A (M=13964.85 Da), (B) H2B (M=13758.79 Da), (C) H3 (M=15256.95 Da) and (D) H4 (M=11236.80 Da).

A

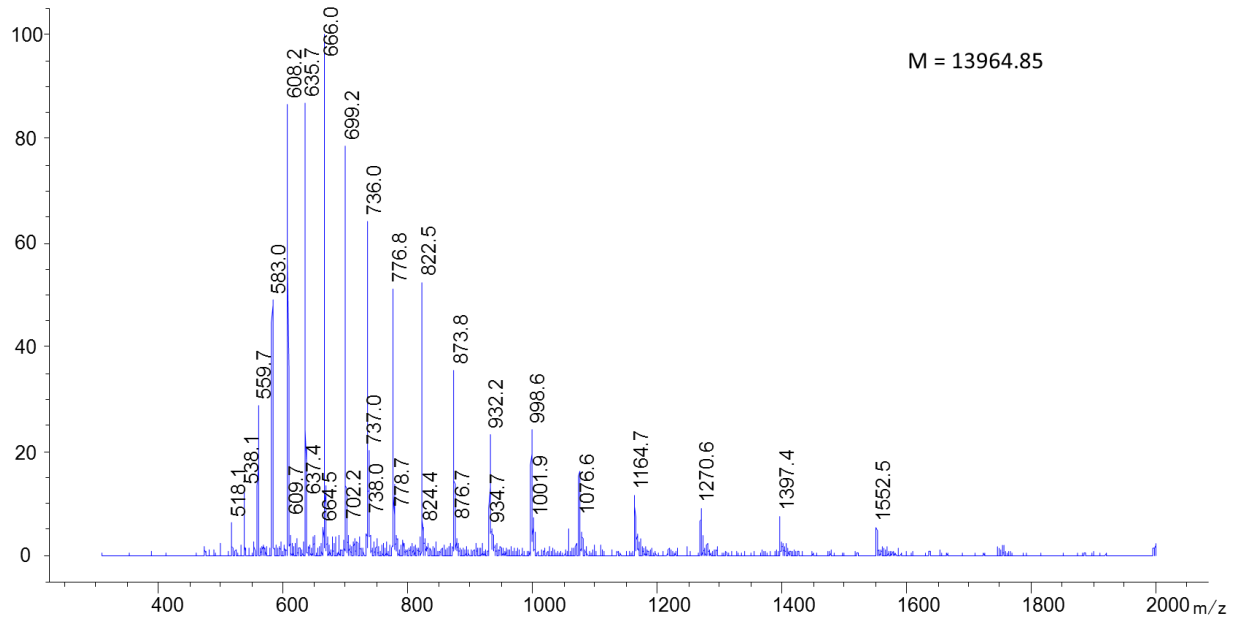

B

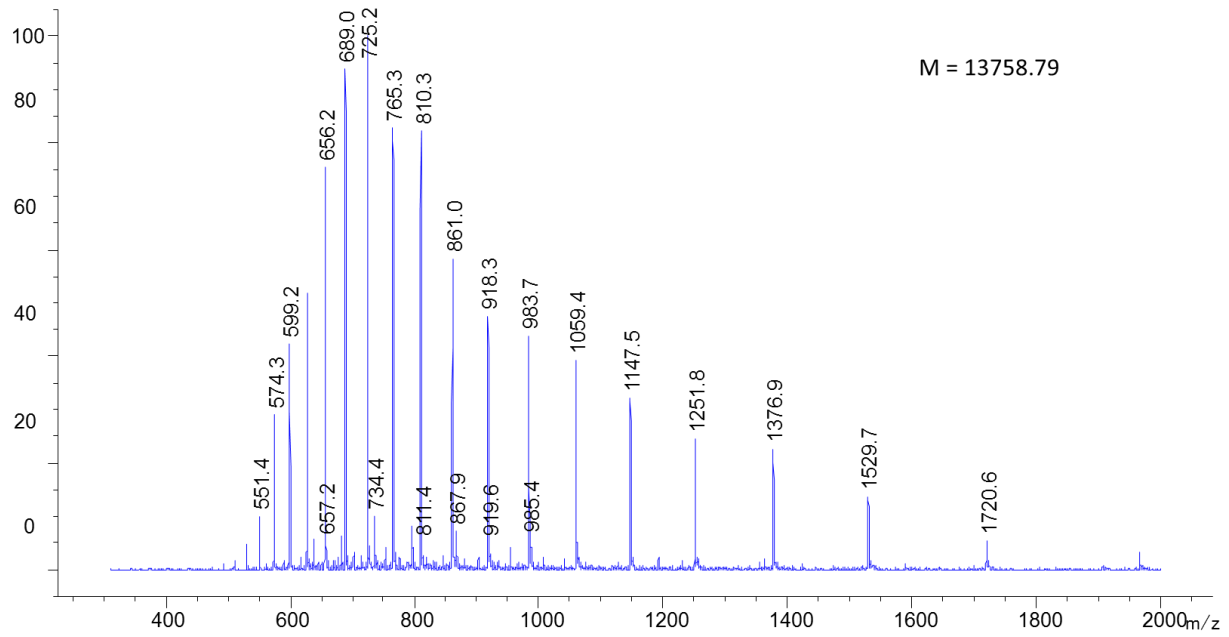

C

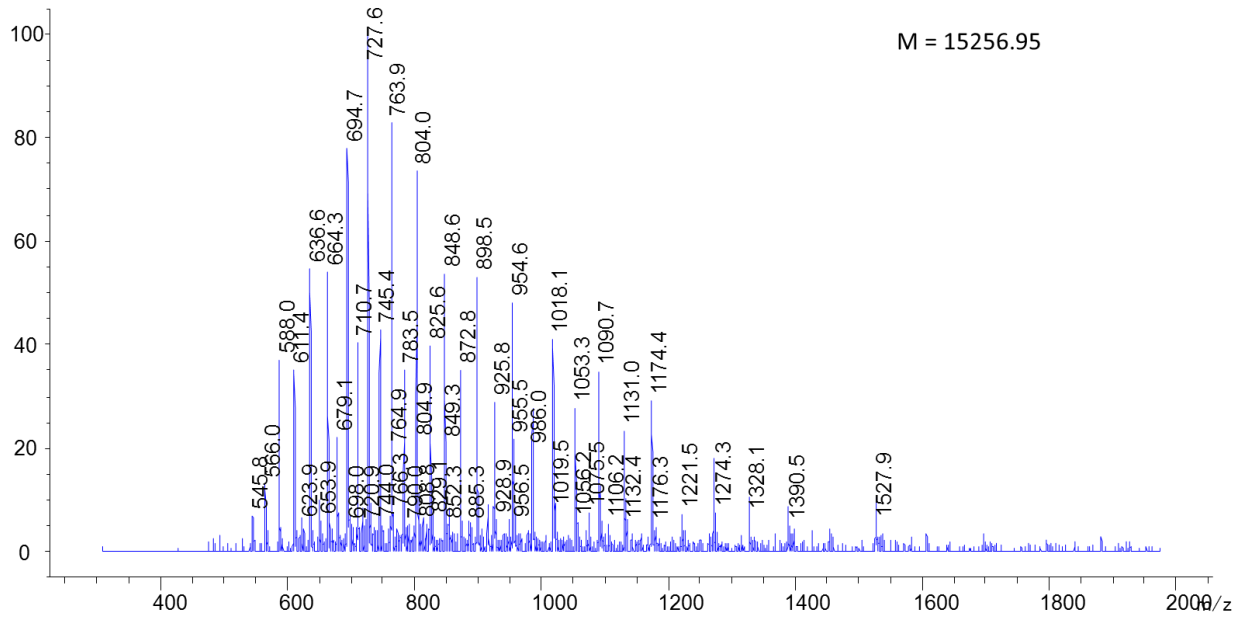

D

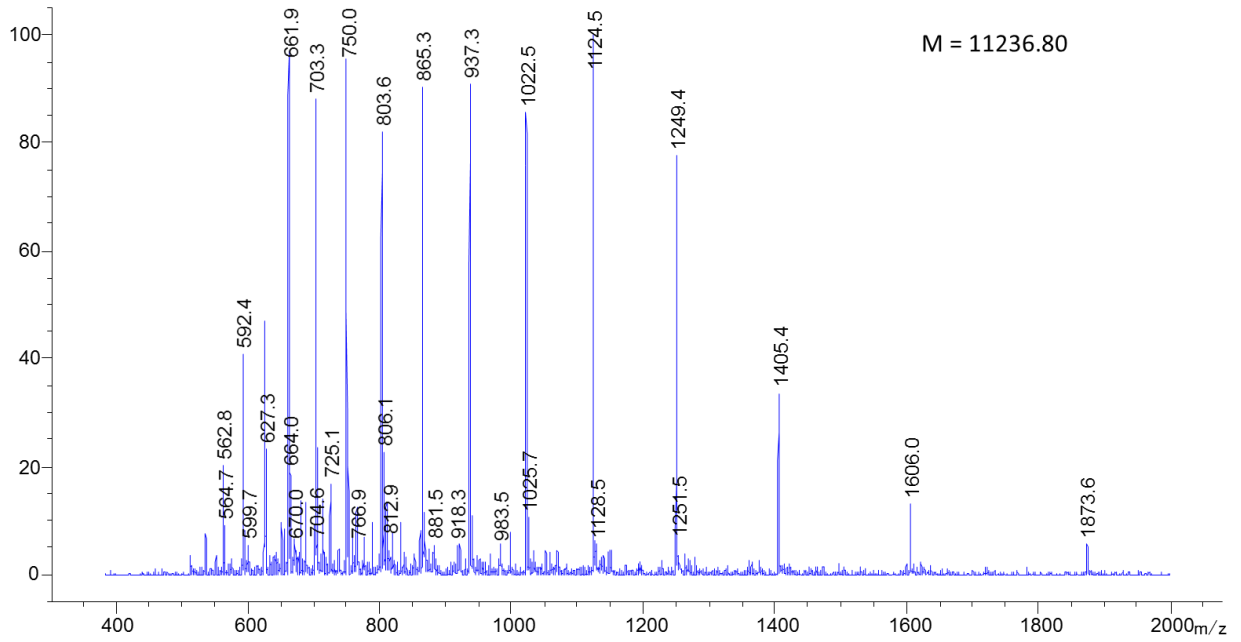

Figure S4. Full gels and uncropped immunoblots.

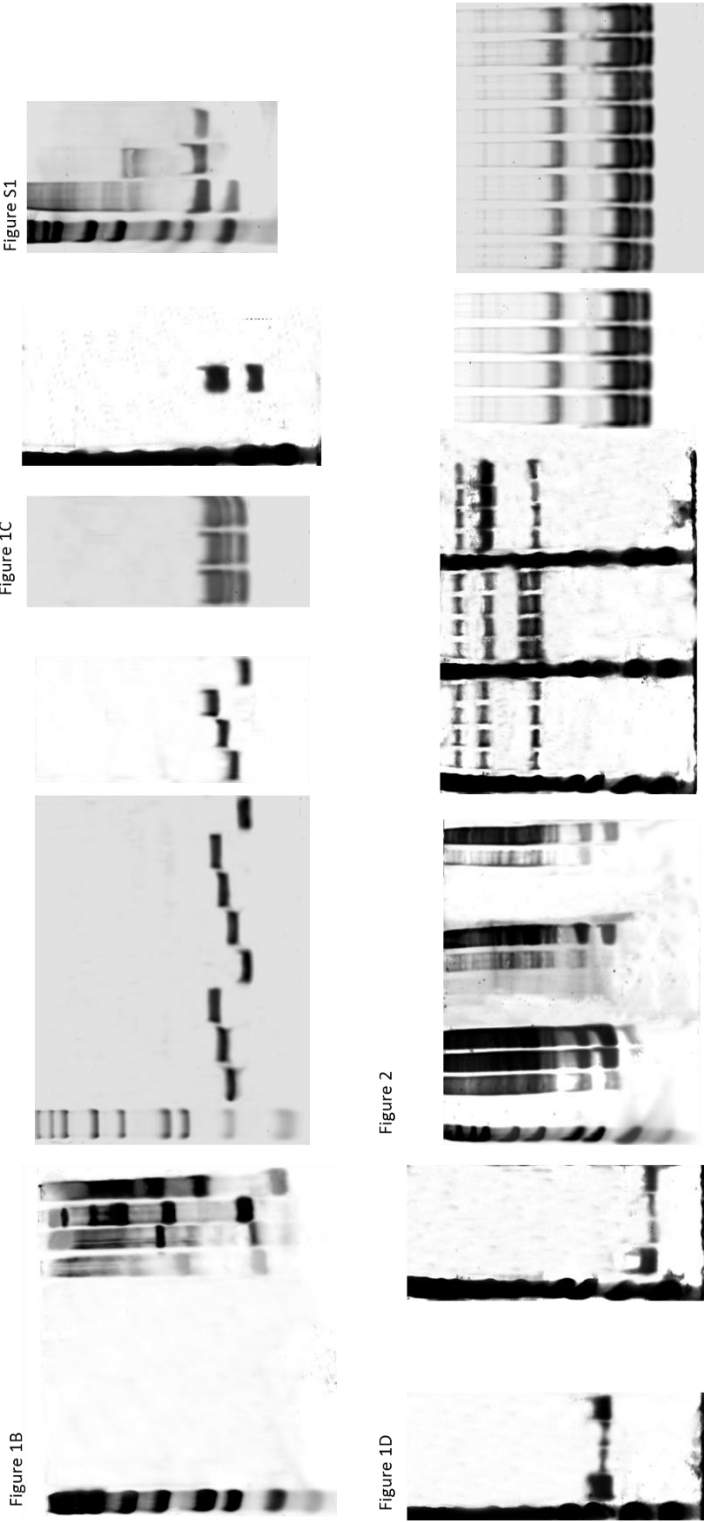

**Figure S5.** HRMS analyses of **2a** and **2b**.

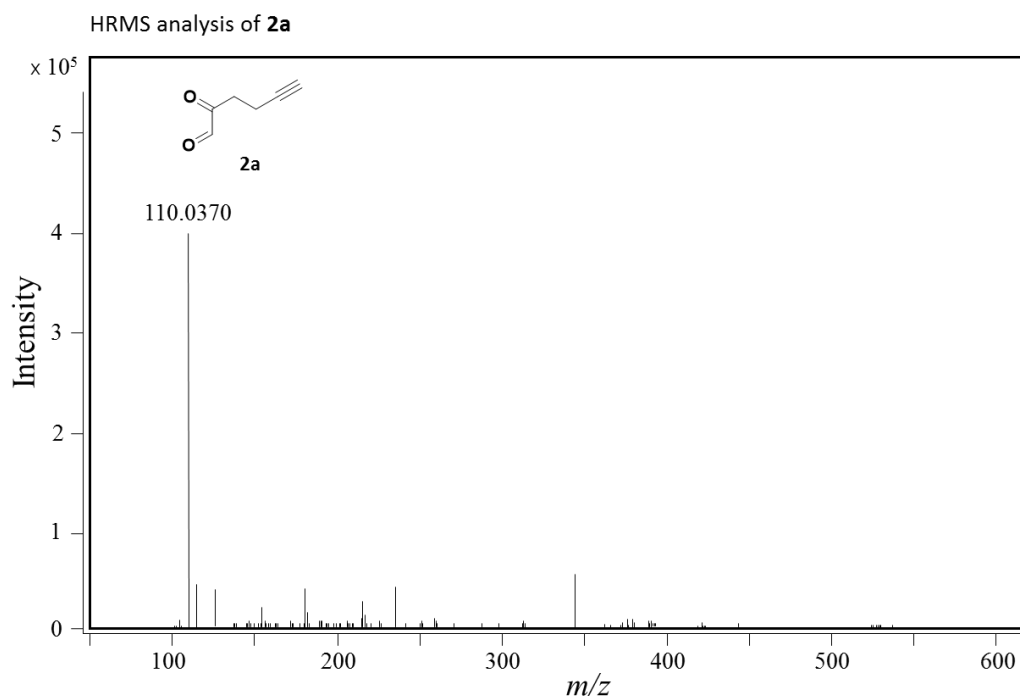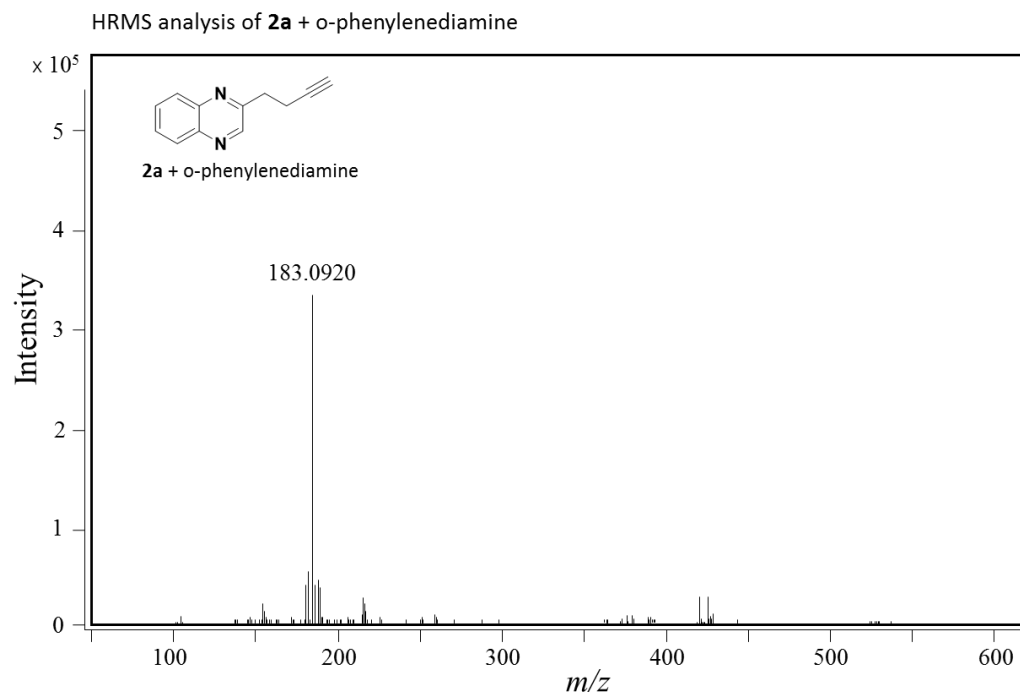



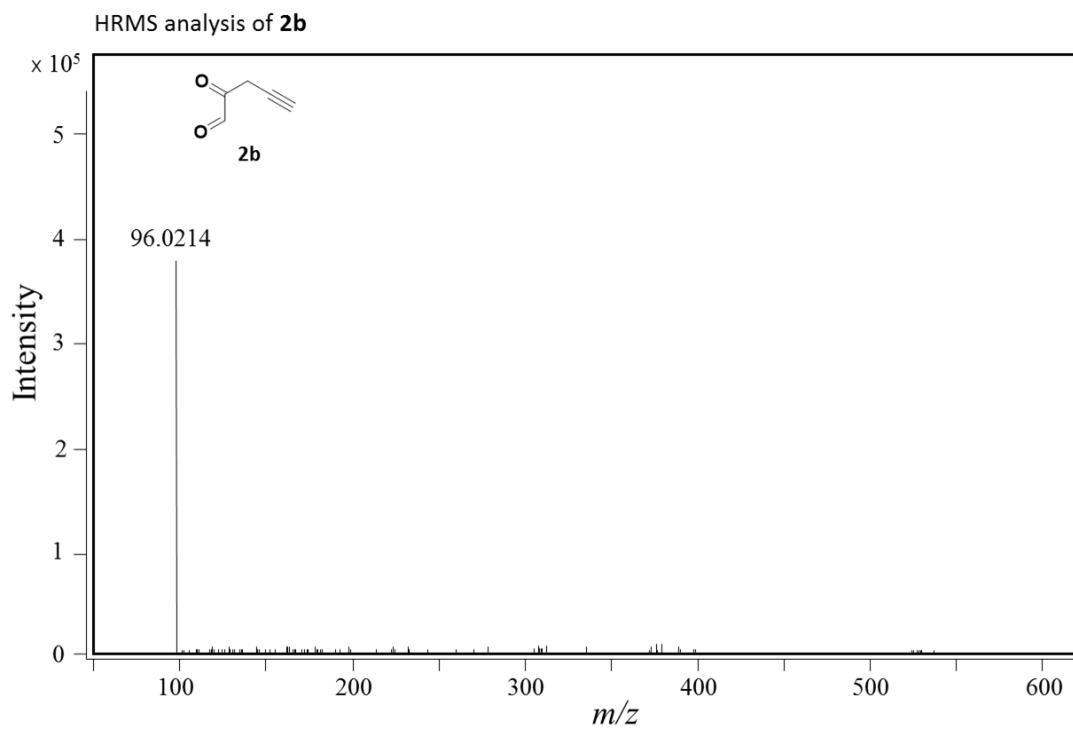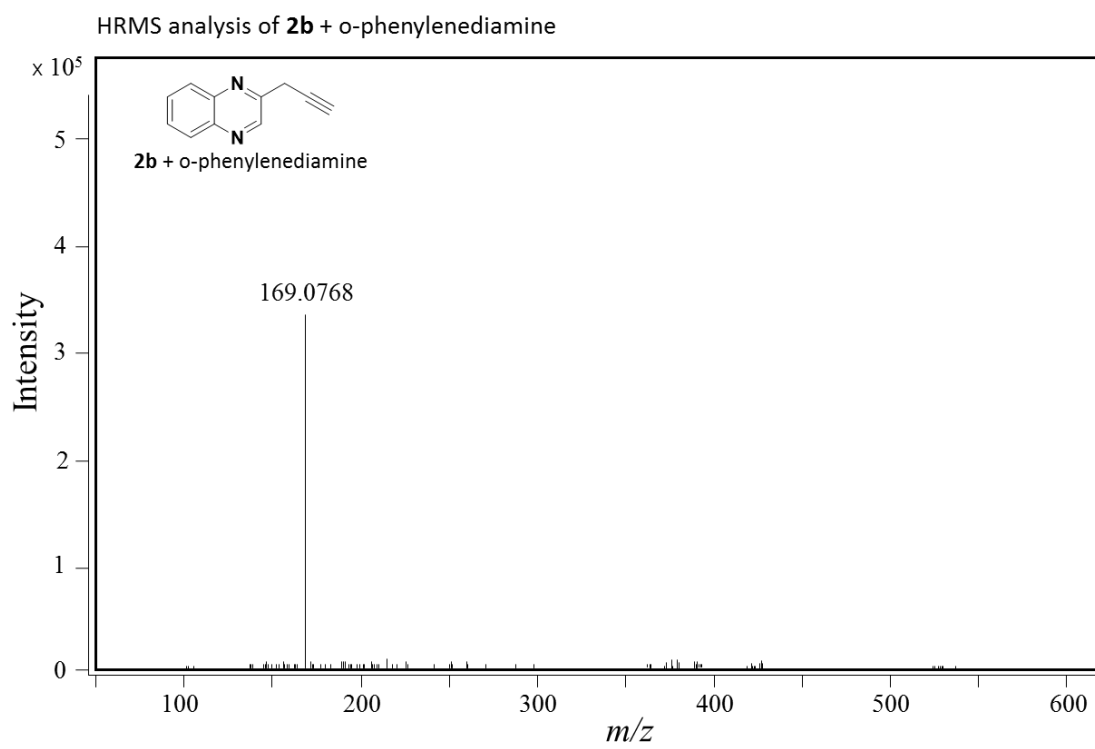

**Figure S6.**  $^1\text{H}$  and  $^{13}\text{C}$  NMR analyses of the compounds synthesized in this study.

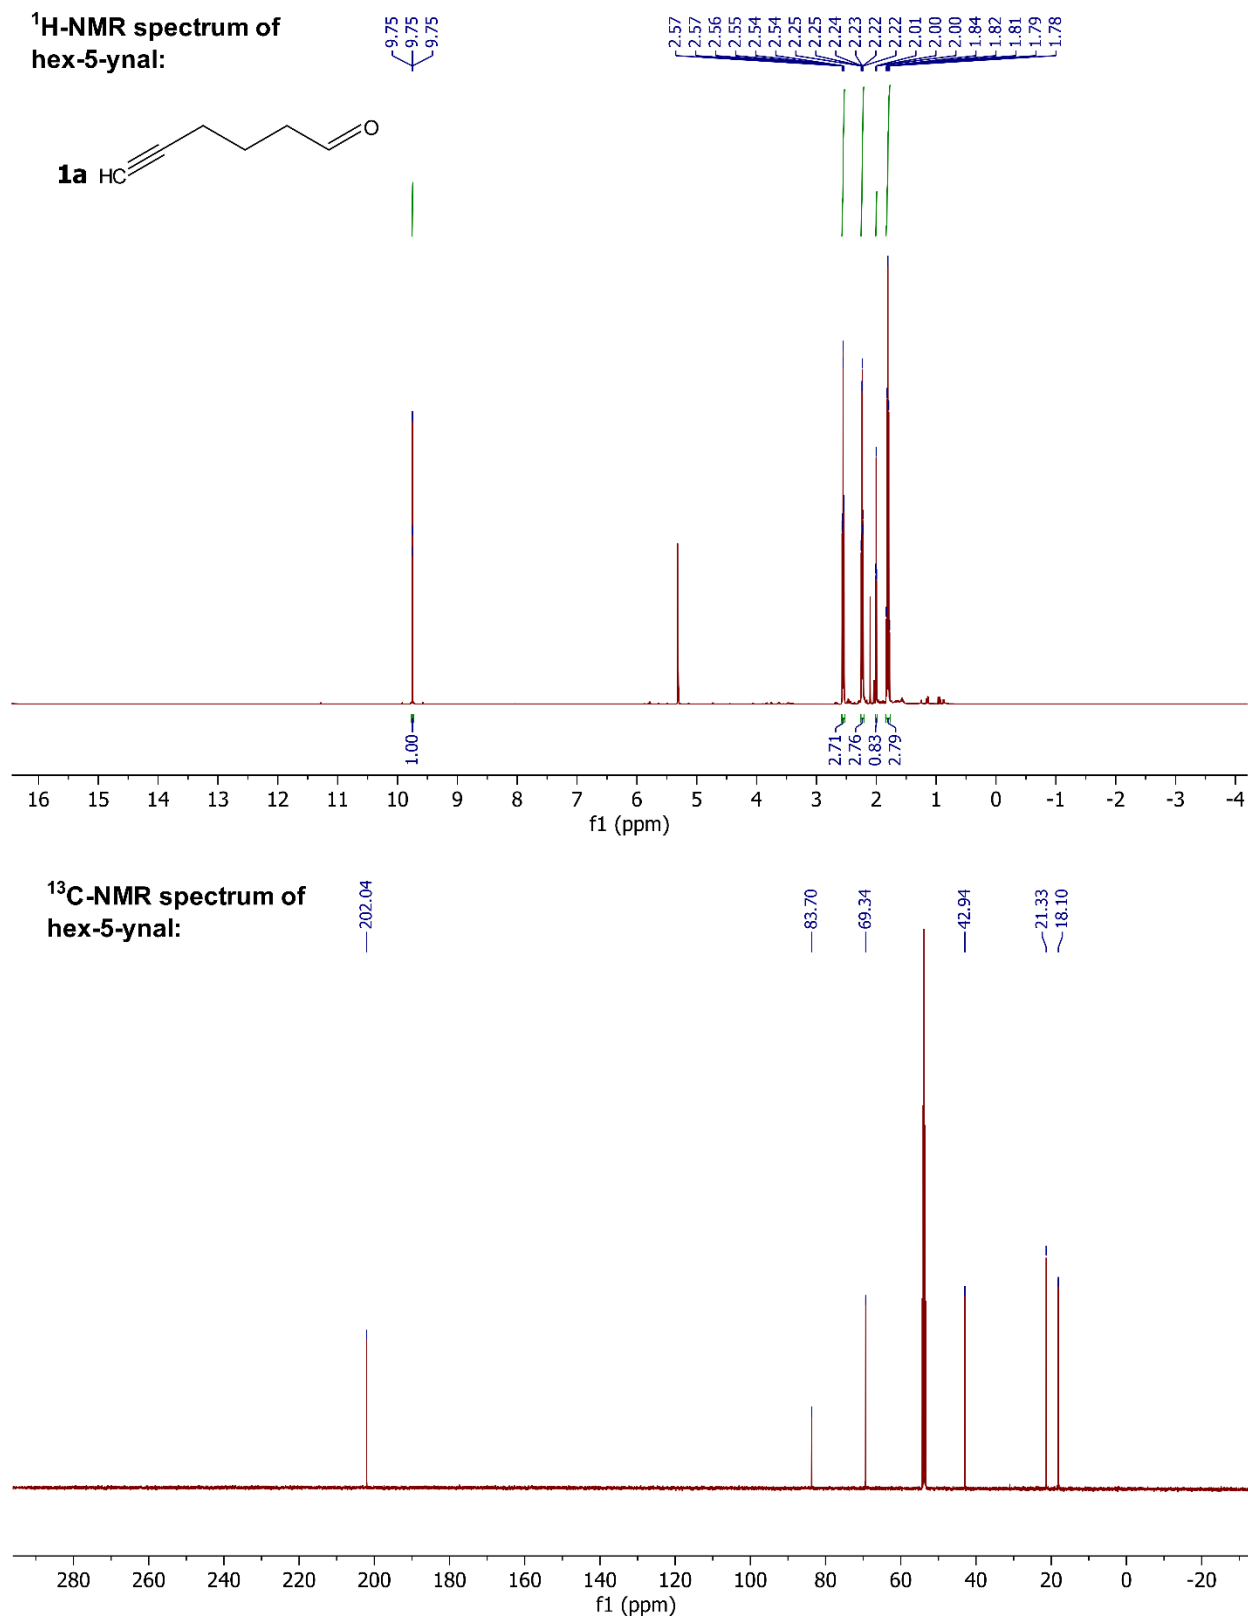

**<sup>1</sup>H-NMR spectrum of  
2-oxohex-5-ynal:**

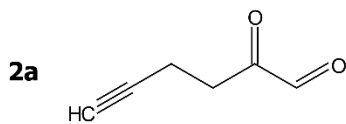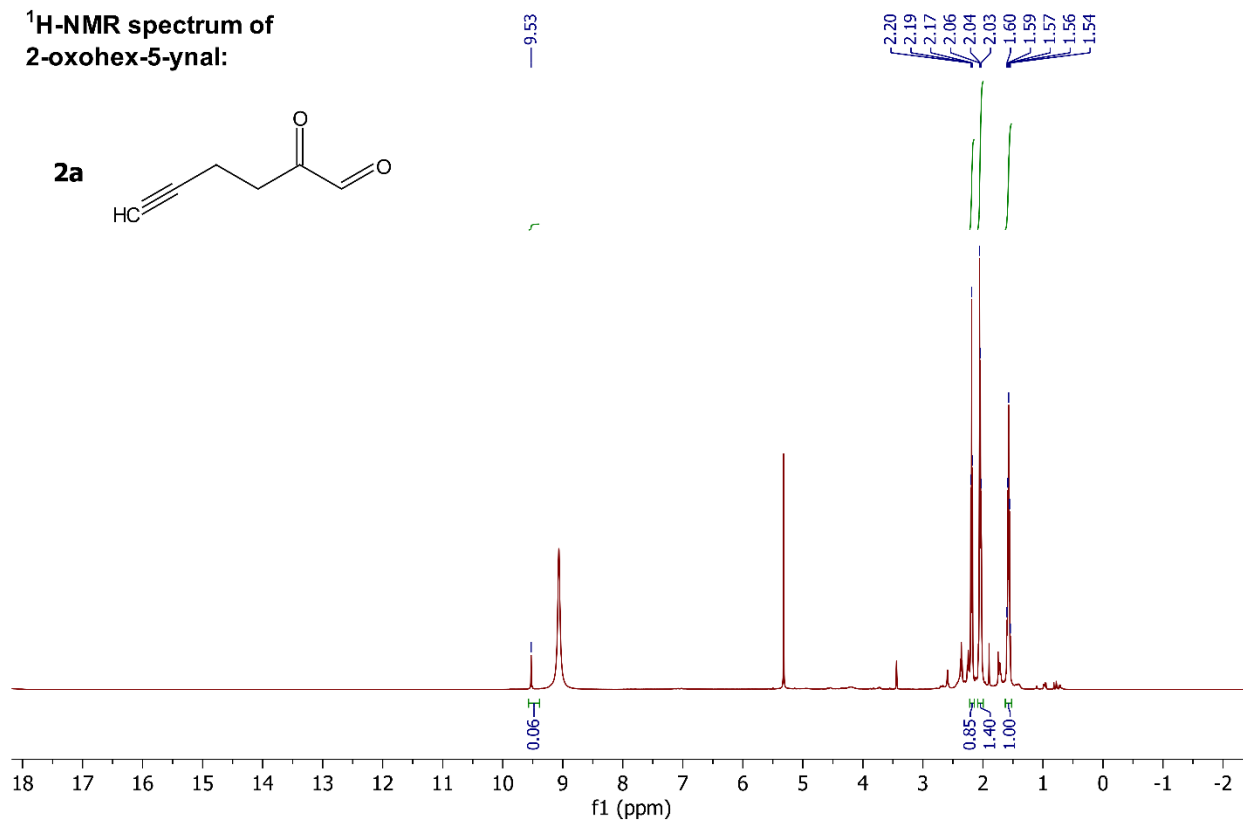

**<sup>13</sup>C-NMR spectrum of  
2-oxohex-5-ynal:**

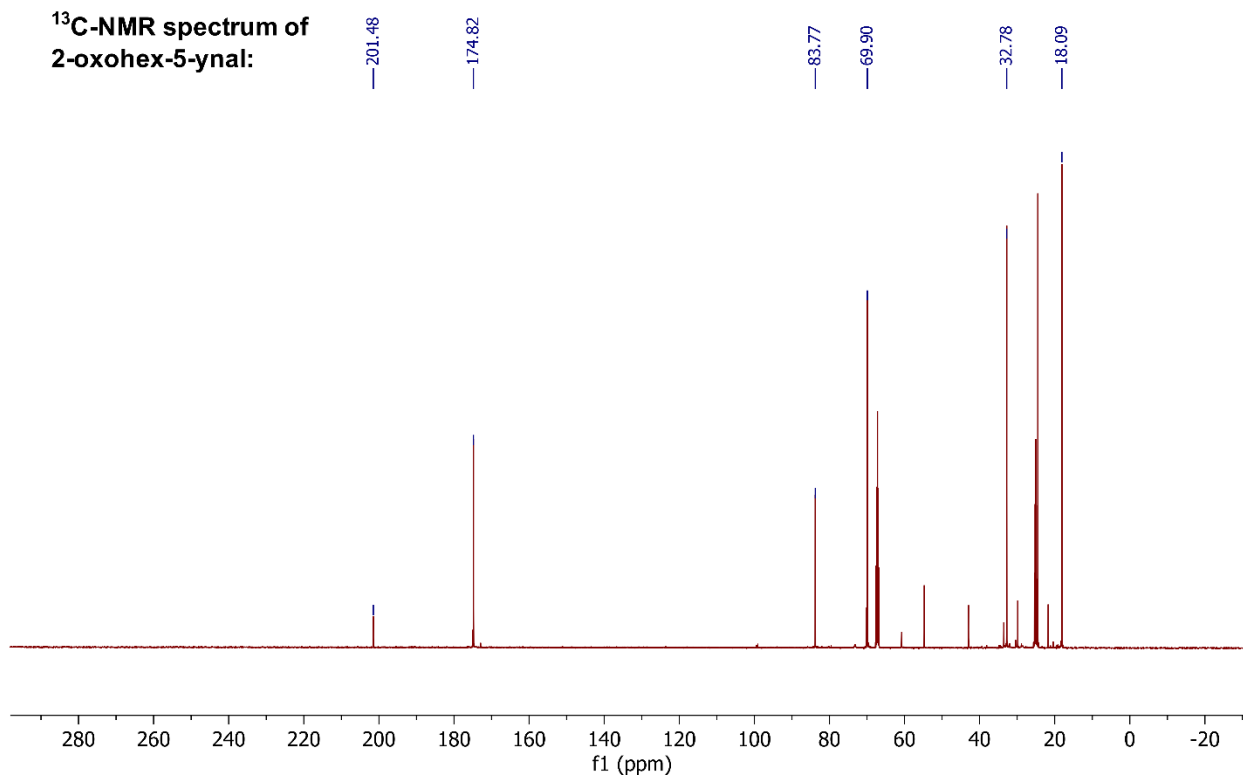

**<sup>1</sup>H-NMR spectrum of pent-4-ynal:**

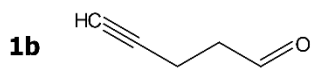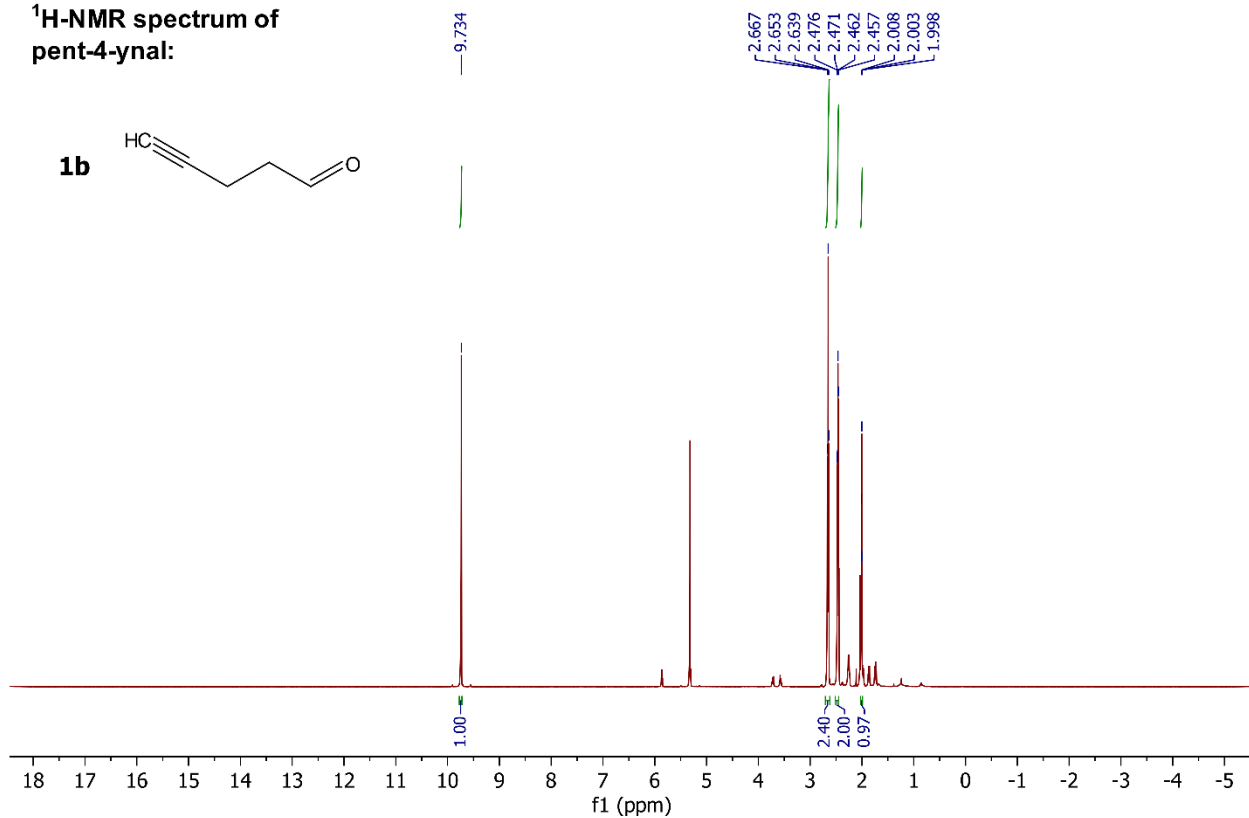

**<sup>13</sup>C-NMR spectrum of pent-4-ynal:**

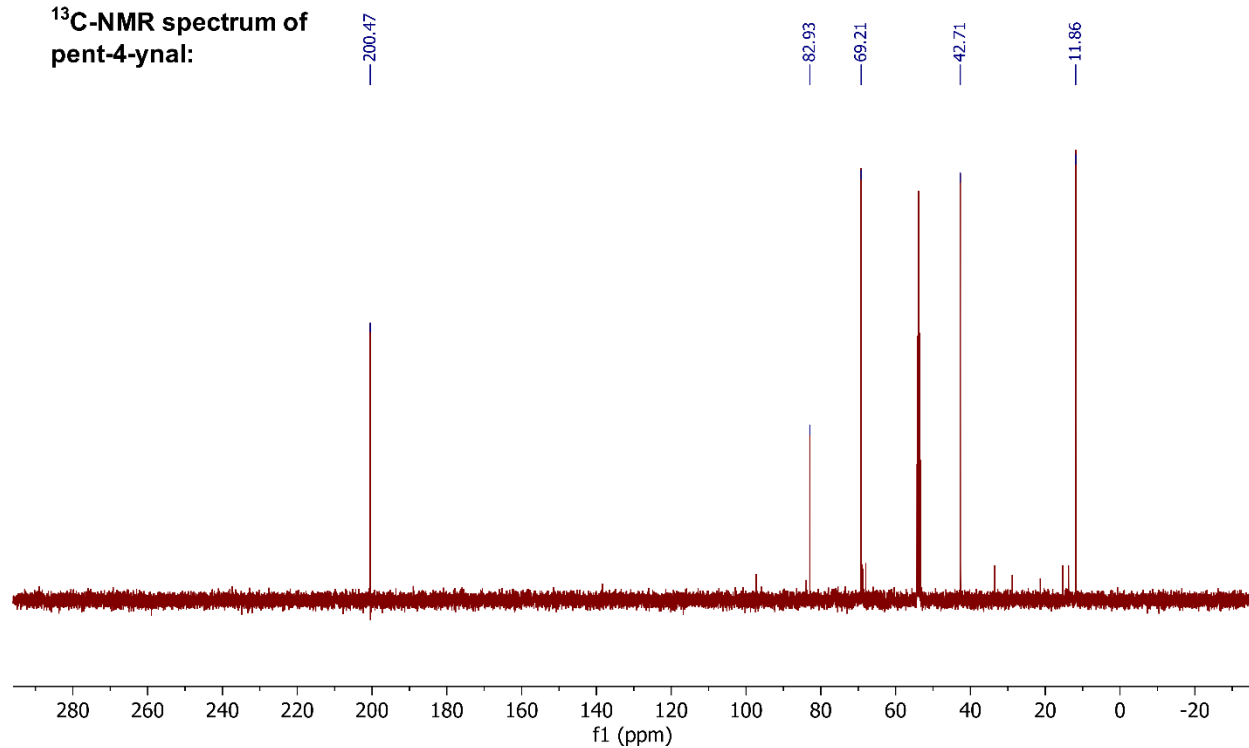

**<sup>1</sup>H-NMR spectrum of 2-oxopent-4-ynal:**

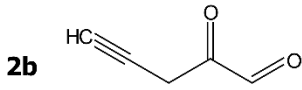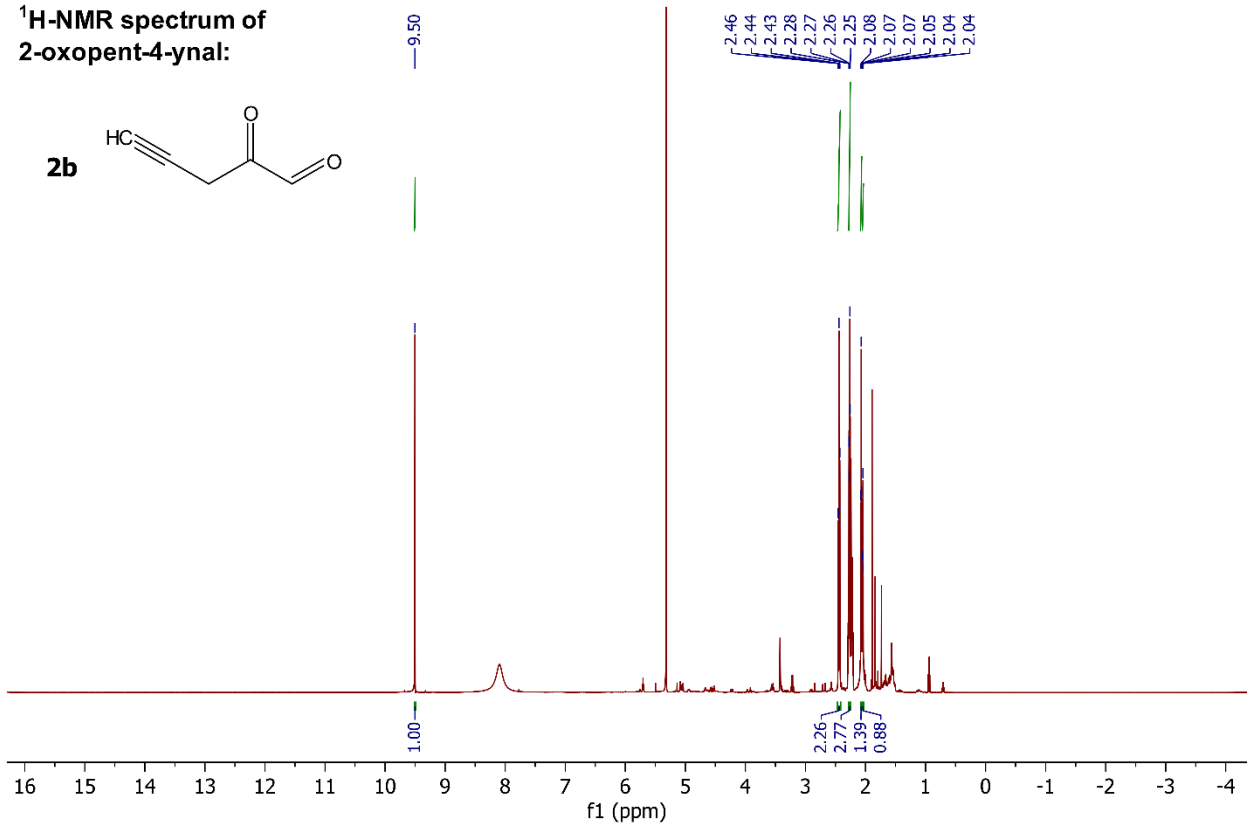

**<sup>13</sup>C-NMR spectrum of 2-oxopent-4-ynal:**

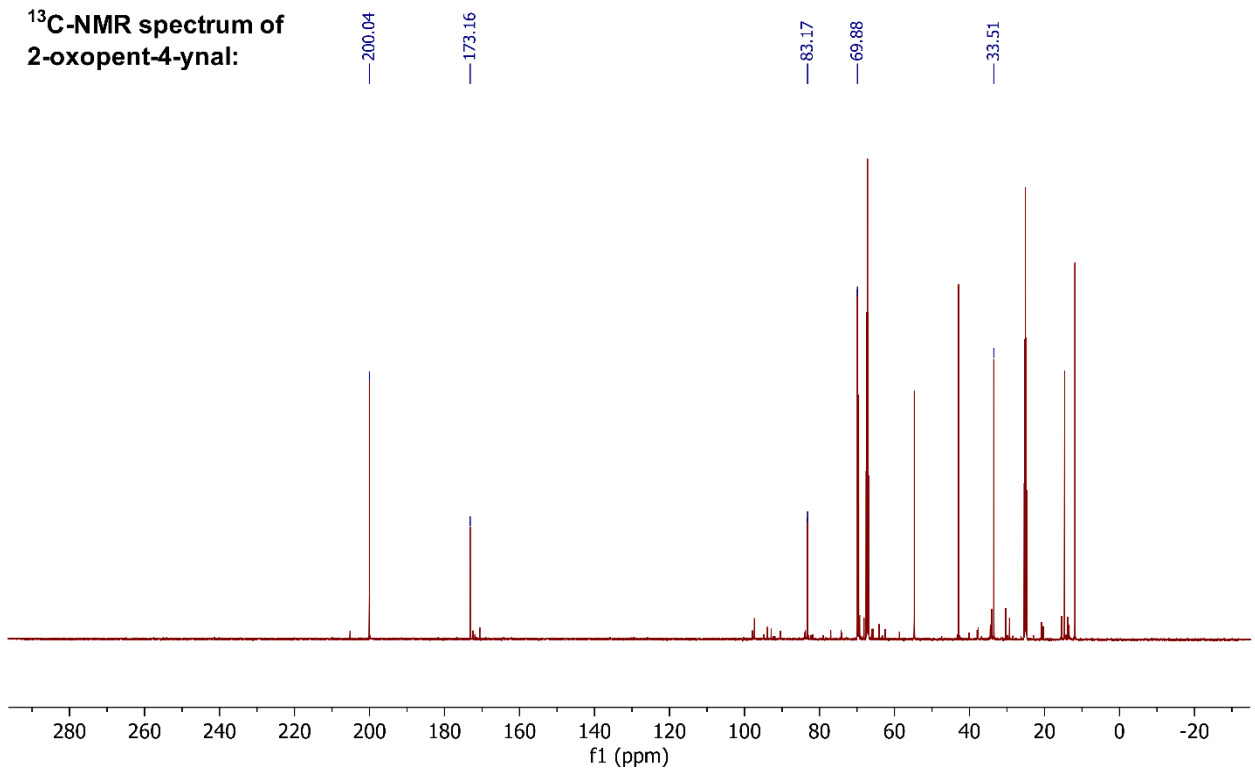

Supplement: NIHMS1684089-supplement-Zheng_SI.pdf [file NIHMS1684089-supplement-Zheng_SI.pdf]
